# Supplementary material for: Complete mitochondrial genomes confirm the generic placement of the plateau vole,Neodon fuscus
Source: Oxford University Press journal article supplement (doi:10.1042/bsr20182349), 2019-07-01
Supplement: bsr-2018-2349_supp.pdf [file bsr-2018-2349_supp.pdf]

# Complete Mitochondrial Genomes Confirm the Generic Placement of the Plateau Vole, *Neodon fuscus*

Jian-Qiu Li<sup>1†</sup>, Li Li<sup>1†</sup>, Bao-Quan Fu<sup>1</sup>, Hong-Bin Yan<sup>1\*</sup>, Wan-Zhong Jia<sup>1, 2\*</sup>

## Supporting Information

**Table S1** Sequence data used in the design of primers.

| <b>Taxon</b>                     | <b>Accession number</b> | <b>Origin of specimen</b> |
|----------------------------------|-------------------------|---------------------------|
| <i>Microtus fortis fortis</i>    | NC015241[1]             | China: Ningxia            |
| <i>Microtus fortis calamorum</i> | NC015243[1]             | China: Hunan              |
| <i>Microtus kikuchii</i>         | NC003041[2]             | China: Taipei             |
| <i>Neodon irene</i>              | NC016055[3]             | China: Sichuan            |
| <i>Microtus levis</i>            | NC008064[4]             | United States: Texas      |
| <i>Proedromys liangshanensis</i> | NC013563[5]             | China: Sichuan            |

**Table S2** Mitochondrial genomes for Glires used in this study and their GenBank accession numbers.

| <b>Species</b>                   | <b>Common name</b>           | <b>Accession number</b> | <b>Species Authority</b> |
|----------------------------------|------------------------------|-------------------------|--------------------------|
| <i>Alticola argentatus</i>       | Silver Mountain Vole         | DQ845186                | Severtzov, 1879.         |
| <i>Alticola barakshin</i>        | Gobi Altai Mountain Vole     | KJ556661[6]             | Bannikov, 1947.          |
| <i>Alticola macrotis</i>         | Large-eared Mountain Vole    | DQ845196                | Radde, 1862.             |
| <i>Apodemus chevrieri</i>        | Chevrier's field mouse       | NC017599[7]             | Milne-Edwards, 1868      |
| <i>Apodemus draco</i>            | South China field mouse      | NC019584                | Barrett-Hamilton, 1900   |
| <i>Arvicola terrestris</i>       | European water vole          | AF159400[8]             | Amori, 1996              |
| <i>Chionomys roberti</i>         | Robert's Snow Vole           | NC007936[9]             | Satunin, 1903            |
| <i>Cricetulus griseus</i>        | Chinese hamster              | NC007936                | Milne-Edwards, 1867      |
| <i>Cricetulus kamensis</i>       | Tibetan dwarf hamster        | NC024592[10]            | Satunin, 1903            |
| <i>Dicrostonyx groenlandicus</i> | Nearctic Collared Lemming    | NC034313                | Traill, 1823             |
| <i>Dicrostonyx hudsonius</i>     | Ungava Collared Lemming      | NC034307                | Pallas, 1778             |
| <i>Dicrostonyx torquatus</i>     | Palaearctic Collared Lemming | NC034646                | Pallas, 1778             |
| <i>Ellobius tancrei</i>          | Eastern Mole Vole            | AF119270                | Blasius, 1884            |
| <i>Eothenomys chinensis</i>      | Sichuan red-backed vole      | NC013571[11]            | Thomas, 1891             |
| <i>Eothenomys melanogaster</i>   | Père David's Red-backed Vole | NC027418[12]            | Milne-Edwards, 1871      |
| <i>Lasiopodomys brandtii</i>     | Brandt's Vole                | JF906120                | Radde, 1861              |
| <i>Lasiopodomys mandarinus</i>   | Mandarin vole                | NC025283[13]            | Milne-Edwards, 1871      |
| <i>Lemmus trimucronatus</i>      | Nearctic Brown Lemming       | AF119276                | Richardson, 1825         |
| <i>Mesocricetus auratus</i>      | Golden hamster               | NC013276                | Waterhouse, 1839         |
| <i>Microtus fortis calamorum</i> | Yangtze vole                 | NC015243                | Thomas, 1902             |
| <i>Microtus fortis fortis</i>    | Reed vole                    | NC015241                | Bünchner, 1889           |
| <i>Microtus kikuchii</i>         | Taiwan vole                  | NC003041                | Kuroda, 1920             |
| <i>Microtus levis</i>            | East European vole           | NC008064                | Miller, 1908             |
| <i>Microtus ochrogaster</i>      | Prairie Vole                 | NC027945                | Wagner, 1842             |
| <i>Mus musculus domesticus</i>   | Western European house mouse | KF937873[14]            | Linnaeus, 1758           |
| <i>Mus musculus musculus</i>     | Eastern European house mouse | NC010339[15]            | Linnaeus, 1758           |
| <i>Mus terricolor</i>            | Earth-colored mouse          | EU352649                | Blyth, 1851              |
| <i>Myodes glareolus</i>          | Bank Vole                    | NC024538[16]            | Schreber, 1780           |
| <i>Myodes rufocanus</i>          | Gray Red-backed Vole         | NC029477[17]            | Sundevall, 1846          |
| <i>Myopus schisticolor</i>       | Wood Lemming                 | AF119263                | Lilljeborg, 1844         |
| <i>Neodon clarkei</i>            | Clarke's Vole                | KP190221                | Hinton, 1923             |
| <i>Neodon irene</i>              | Irene's mountain vole        | NC016055                | Thomas, 1911             |

---

|                                  |                             |              |                  |
|----------------------------------|-----------------------------|--------------|------------------|
| <i>Neodon juldaschi</i>          | Juniper Mountain Vole       | EF599113     | Severtzov, 1879  |
| <i>Neodon leucurus</i>           | Blyth's Mountain Vole       | KP190225     | Blyth, 1863      |
| <i>Neodon linzhiensis</i>        | unkown                      | HQ123618     | Liu, 2012        |
| <i>Neodon sikimensis</i>         | Sikkim Mountain Vole        | HQ123606     | Horsfield, 1841  |
| <i>Neodon sp.1 WJ-2014</i>       | unkown                      | KP190217     | Liu, 2014        |
| <i>Niviventer excelsior</i>      | Large white-bellited rat    | NC019617[18] | Thomas, 1911     |
| <i>Ochotona collaris</i>         | Collared pika               | NC003033[2]  | Nelson, 1893     |
| <i>Ochotona curzoniae</i>        | Black-lipped pika           | NC011029     | Hodgson, 1858    |
| <i>Petaurista hainana</i>        | gaint flying squirrel       | NC023089     | G. Allen, 1925   |
| <i>Proedromys liangshanensis</i> | Vole                        | NC013563     | Liu, 2007        |
| <i>Pteromys volans</i>           | Siberian flying squirrel    | NC019612[19] | Linnaeus, 1758   |
| <i>Rattus norvegicus</i>         | Norway rat                  | NC001665     | Berkenhout, 1769 |
| <i>Rattus rattus</i>             | Black rat                   | NC012374[20] | Linnaeus, 1758   |
| <i>Sciurus vulgaris</i>          | Eurasian red squirrel       | NC002369[21] | Linnaeus, 1758   |
| <i>Synaptomys borealis</i>       | Northern Bog Lemming        | AF119259     | Richardson, 1828 |
| <i>Synaptomys cooperi</i>        | Southern Bog Lemming        | DQ323957[22] | Baird, 1857      |
| <i>Tscherskia triton</i>         | Greater long-tailed hamster | NC013068     | de Winton, 1899  |

---

**Table S3** Codon usage in the mitochondrial genome of *N. fuscus* with each value representing the total number and percentage of codons in all the 13 protein-coding genes.

| <b>Condon</b> | <b>Count (%)</b> | <b>Condon</b> | <b>Count (%)</b> | <b>Condon</b> | <b>Count (%)</b> | <b>Condon</b> | <b>Count (%)</b> |
|---------------|------------------|---------------|------------------|---------------|------------------|---------------|------------------|
| UUU-Phe       | 60 (1.566)       | UCU-Ser       | 68 (1.774)       | UAU-Tyr       | 84 (2.192)       | UGU-Cys       | 17 (0.444)       |
| UUC-Phe       | 100 (2.609)      | UCC-Ser       | 101 (2.636)      | UAC-Tyr       | 74 (1.931)       | UGC-Cys       | 20 (0.522)       |
| UUA-Leu       | 88 (2.296)       | UCA-Ser       | 125 (3.262)      | UAA-Stop      | 75 (1.957)       | UGA-Stop      | 67 (1.748)       |
| UUG-Leu       | 22 (0.574)       | UCG-Ser       | 30 (0.783)       | UAG-Stop      | 47 (1.227)       | UGG-Trp       | 17 (0.444)       |
| CUU-Leu       | 65 (1.696)       | CCU-Pro       | 112 (2.923)      | CAU-His       | 77 (2.009)       | CGU-Arg       | 15 (0.391)       |
| CUC-Leu       | 84 (2.192)       | CCC-Pro       | 85 (2.218)       | CAC-His       | 87 (2.270)       | CGC-Arg       | 18 (0.470)       |
| CUA-Leu       | 155 (4.045)      | CCA-Pro       | 122 (3.184)      | CAA-Gln       | 101 (2.636)      | CGA-Arg       | 26 (0.678)       |
| CUG-Leu       | 43 (1.122)       | CCG-Pro       | 20 (0.522)       | CAG-Gln       | 46 (1.200)       | CGG-Arg       | 9 (0.235)        |
| AUU-Ile       | 107 (2.792)      | ACU-Thr       | 85 (2.218)       | AAU-Asn       | 71 (1.853)       | AGU-Ser       | 25 (0.652)       |
| AUC-Ile       | 106 (2.766)      | ACC-Thr       | 82 (2.140)       | AAC-Asn       | 99 (2.583)       | AGC-Ser       | 56 (1.461)       |
| AUA-Ile       | 123 (3.210)      | ACA-Thr       | 143 (3.732)      | AAA-Lys       | 96 (2.505)       | AGA-Arg       | 15 (0.391)       |
| AUG-Met       | 51 (1.331)       | ACG-Thr       | 21 (0.548)       | AAG-Lys       | 23 (0.600)       | AGG-Arg       | 21 (0.548)       |
| GUU-Val       | 24 (0.626)       | GCU-Ala       | 46 (1.200)       | GAU-Asp       | 33 (0.861)       | GGU-Gly       | 19 (0.496)       |
| GUC-Val       | 40 (1.044)       | GCC-Ala       | 82 (2.140)       | GAC-Asp       | 52 (1.357)       | GGC-Gly       | 48 (1.253)       |
| GUA-Val       | 48 (1.253)       | GCA-Ala       | 53(1.383)        | GAA-Glu       | 60 (1.566)       | GGA-Gly       | 46 (1.200)       |
| GUG-Val       | 24 (0.626)       | GCG-Ala       | 15 (0.391)       | GAG-Glu       | 27 (0.705)       | GGG-Gly       | 30 (0.783)       |

**Figure S1** Phylogenetic tree inferred from the 13 concatenated protein-coding genes from 33 species using ML analysis. The number at a node represents bootstrap value. ★ Indicates *N. fuscus* examined in our study. *Ochotona collaris* and *O. curzoniae* are used as outgroups.

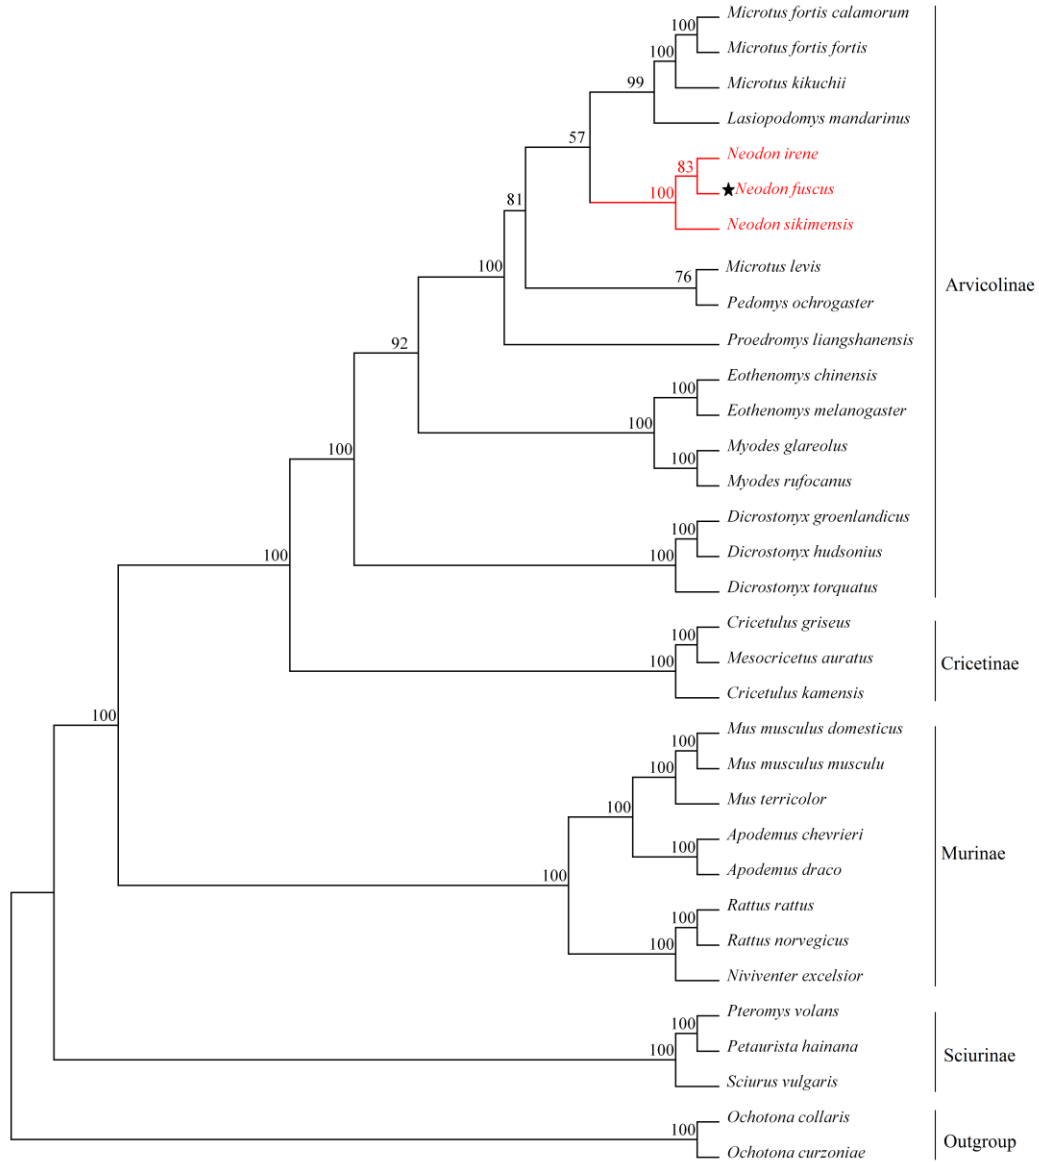

**Figure S2** The multiple sequence alignment based on the D-loop region of 37 individuals of *N. fuscus*. Highlighted are the 384<sup>th</sup> and 691<sup>th</sup> bases are variable.

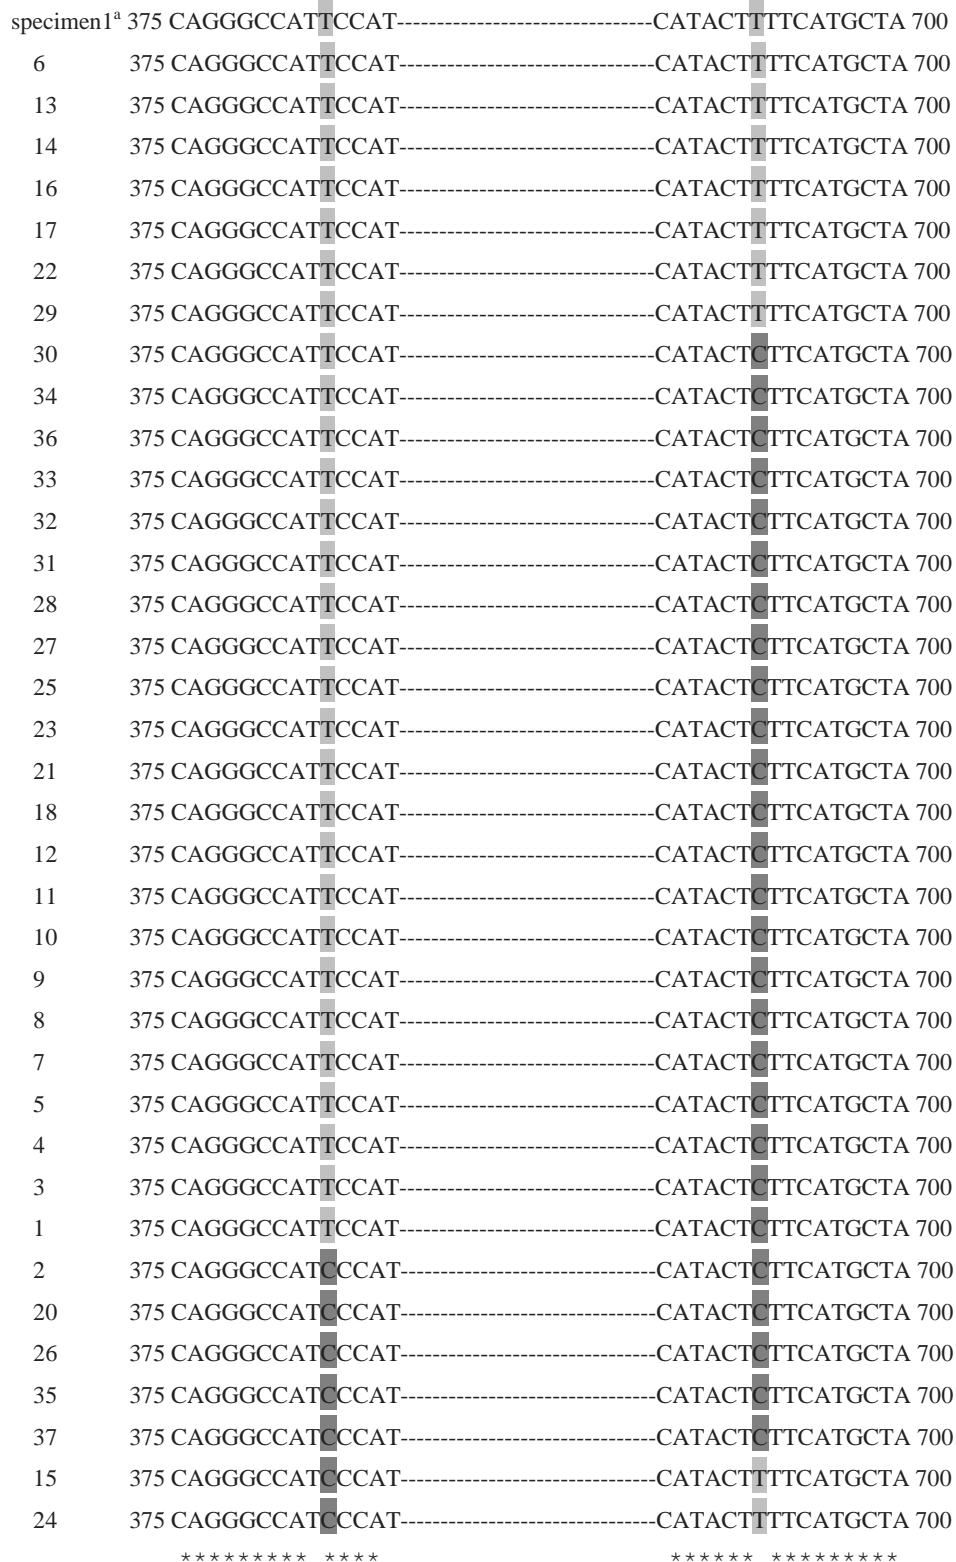

a: The specimen was used for sequencing of complete mtDNA in the study.

Reference:

- 1 Jiang, X., Gao, J., Ni, L., Hu, J., Li, K., Sun, F., Xie, J., Bo, X., Gao, C., Xiao, J., Zhou, Y. (2012). The complete mitochondrial genome of *Microtus fortis calamorum* (Arvicolinae, Rodentia) and its phylogenetic analysis. *Gene* **498**, 288-295, doi:10.1016/j.gene.2012.02.022
- 2 Lin, Y. H., Waddell, P. J. & Penny, D. (2002) . Pika and vole mitochondrial genomes increase support for both rodent monophyly and glires. *Gene* **294**, 119-129
- 3 Fan, L., Fan, Z., Yue, H., Zhang, X., Liu, Y., Sun, Z., Liu, S., Yue, B. (2011). Complete mitochondrial genome sequence of the Chinese scrub vole (*Neodon irene*). *Mitochondrial DNA* **22**, 50-52, doi:10.3109/19401736.2011.603312
- 4 Triant, D. A. & Dewoody, J. A. (2006). Accelerated molecular evolution in *Microtus* (Rodentia) as assessed via complete mitochondrial genome sequences. *Genetica* **128**, 95-108, doi:10.1007/s10709-005-5538-6
- 5 Hao, H., Liu, S., Zhang, X., Chen, W., Song, Z., Peng, H., Liu, Y., Yue, B. (2011). Complete mitochondrial genome of a new vole *Proedromys liangshanensis* (Rodentia: Cricetidae) and phylogenetic analysis with related species: are there implications for the validity of the genus *Proedromys*? *Mitochondrial DNA* **22**, 28-34, doi:10.3109/19401736.2011.588220
- 6 Kohli, B. A., Speer, K. A., Kilpatrick, C. W., Batsaikhan, N., Damdinbazar, D., Cook, J. A. (2014). Multilocus systematics and non-punctuated evolution of *Holarctic Myodini* (Rodentia: Arvicolinae). *Molecular phylogenetics and evolution* **76**, 18-29, doi:10.1016/j.ympev.2014.02.019
- 7 Yue, H., Fan, Z., Liu, S., Liu, Y., Song, Z., Zhang, X. (2012). A mitogenome of the Chevrier's field mouse (*Apodemus chevrieri*) and genetic variations inferred from the cytochrome b gene. *DNA and cell biology* **31**, 460-469, doi:10.1089/dna.2011.1301
- 8 Martin, Y., Gerlach, G., Schlotterer, C. & Meyer, A. (2000). Molecular phylogeny of European muroid rodents based on complete cytochrome b sequences. *Molecular phylogenetics and evolution* **16**, 37-47, doi:10.1006/mpev.1999.0760
- 9 Partridge, M. A., Davidson, M. M. & Hei, T. K. (2007). The complete nucleotide sequence of Chinese hamster (*Cricetulus griseus*) mitochondrial DNA. *DNA sequence : the journal of DNA sequencing and mapping* **18**, 341-346, doi:10.1080/10425170601101287
- 10 Kang, C., Yue, H., Liu, M., Huang, T., Liu, Y., Zhang, X., Yue, B., Zeng, T., Liu, S. (2016). The complete mitochondrial genome of *Cricetulus kamensis* (Rodentia: Cricetidae). *Mitochondrial DNA. Part A, DNA mapping, sequencing, and analysis* **27**, 976-977, doi:10.3109/19401736.2014.926513
- 11 Yang, C., Hao, H., Liu, S., Liu, Y., Yue, B., Zhang, X. (2012). Complete mitochondrial genome of the Chinese oriental vole *Eothenomys chinensis* (Rodentia: Arvicolinae). *Mitochondrial DNA* **23**, 131-133, doi:10.3109/19401736.2012.660926
- 12 Chen, S., Chen, G., Wei, H. & Wang, Q. (2016). Complete mitochondrial genome of the Pere David's Vole, *Eothenomys melanogaster* (Rodentia: Arvicolinae). *Mitochondrial DNA. Part A, DNA mapping, sequencing, and analysis* **27**, 2496-2497, doi:10.3109/19401736.2015.1036246
- 13 Cong H, Kong L, Liu Z, Wu Y, Motokawa M, Harada M, Li Y. (2016). Complete mitochondrial genome of the mandarin vole *Lasiopodomys mandarinus* (Rodentia: Cricetidae). *Mitochondrial DNA. Part A, DNA mapping, sequencing, and analysis* **27**, 760-761, doi:10.3109/19401736.2014.915528
- 14 Zheng, J., Chen, Y., Deng, F., Huang, R., Petersen, F., Ibrahim, S., Yu, X. (2014). mtDNA sequence, phylogeny and evolution of laboratory mice. *Mitochondrion* **17**, 126-131, doi:10.1016/j.mito.2014.07.006
- 15 Gregorova, S., Divina, P., Storchova, R., Trachtulec, Z., Fotopulosova, V., Svenson, K.L., Donahue,

- L. R., Paigen, B., Forejt, J. (2008). Mouse consomic strains: exploiting genetic divergence between *Mus m. musculus* and *Mus m. domesticus* subspecies. *Genome research* **18**, 509-515, doi:10.1101/gr.7160508
- 16 Bendova, K., Markova, S., Searle, J. B. & Kotlik, P. (2016). The complete mitochondrial genome of the bank vole *Clethrionomys glareolus* (Rodentia: Arvicolinae). *Mitochondrial DNA. Part A, DNA mapping, sequencing, and analysis* **27**, 111-112, doi:10.3109/19401736.2013.873927
- 17 Lu, T., Zhu, M., Yi, C., Si, C., Yang, C., Chen, H. (2017). Complete mitochondrial genome of the gray red-backed vole (*Myodes rufocanus*) and a complete estimate of the phylogenetic relationships in Cricetidae. *Mitochondrial DNA. Part A, DNA mapping, sequencing, and analysis* **28**, 62-64, doi:10.3109/19401736.2015.1110799
- 18 Chen, W., Sun, Z., Liu, Y., Yue, B. & Liu, S. (2012). The complete mitochondrial genome of the large white-bellied rat, *Niviventer excelsior* (Rodentia: Muridae). *Mitochondrial DNA* **23**, 363-365, doi:10.3109/19401736.2012.696627.
- 19 Ryu, S. H., Kwak, M. J. & Hwang, U. W. (2013). Complete mitochondrial genome of the Eurasian flying squirrel *Pteromys volans* (Sciuromorpha, Sciuridae) and revision of rodent phylogeny. *Molecular biology reports* **40**, 1917-1926, doi:10.1007/s11033-012-2248-x
- 20 Robins, J.H., McLenachan, P.A., Phillips, M.J., Craig, L., Ross, H.A., Matisoo-Smith, E. (2008). Dating of divergences within the *Rattus* genus phylogeny using whole mitochondrial genomes. *Molecular phylogenetics and evolution* **49**, 460-466, doi:10.1016/j.ympev.2008.08.001
- 21 Reyes, A., Gissi, C., Pesole, G., Catzeflis, F. M. & Saccone, C. (2000). Where do rodents fit? Evidence from the complete mitochondrial genome of *Sciurus vulgaris*. *Molecular biology and evolution* **17**, 979-983, doi:10.1093/oxfordjournals.molbev.a026379
- 22 Triant, D. A. & Dewoody, J. A. (2007). Extensive mitochondrial DNA transfer in a rapidly evolving rodent has been mediated by independent insertion events and by duplications. *Gene* **401**, 61-70, doi:10.1016/j.gene.2007.07.003.
